1 **TITLE PAGE**

2

3 **Speed Control and Force-Vectoring of Blue Bottle Flies in a Magnetically-Levitated**  
4 **Flight Mill**

5

6

7 Shih-Jung Hsu<sup>1</sup>, Neel Thakur<sup>1</sup>, Bo Cheng<sup>1,\*</sup>

8

9 <sup>1</sup> Department of Mechanical and Nuclear Engineering, Pennsylvania State University, University  
10 Park, PA 16802, USA

11

12 \*Author for correspondence (buc10@psu.edu)

13

14 Keywords: insect flight, flapping flight, Calliphora, helicopter model

15

16 Summary statement: This paper elucidates how flies control flight speed while flying in a  
17 magnetically-levitated (MAGLEV) flight mill, which enables the manipulation of body pitch  
and aerodynamic load.

18

19

20 Running title: Speed Control of Blue Bottle Flies in a MAGLEV Flight Mill

21

22

23

24

25  
26  
27  
28  
29  
30  
31  
32  
33  
34  
35  
36  
37  
38  
39  
40

## ABSTRACT

Flies fly at a broad range of speeds and produce sophisticated aerial maneuvers with precisely controlled wing movements. Remarkably, only subtle changes in wing motion are used by flies to produce aerial maneuvers, resulting in little directional tilt of aerodynamic force vector relative to the body. Therefore, it is often considered that flies fly according to a helicopter model and control speed mainly via force-vectoring enabled primarily by body-pitch change. Here we examine the speed control of blue bottle flies using a magnetically-levitated (MAGLEV) flight mill, as they fly at different body pitch and with different augmented aerodynamic damping. We identify wing kinematic contributors to the changes of estimated aerodynamic force through testing two force-vectoring models. Results show that in addition to body pitch, flies also use a collection of wing kinematic variables to control both force magnitude and direction, the roles of which are analogous to those of throttle, collective and cyclic pitch of helicopters. Our results also suggest that the MAGLEV flight mill system can be potentially used to study the roles of visual and mechanosensory feedback in insect flight control.

## 41 INTRODUCTION

42 Flies are eminent miniature flyers that exercise stable and agile flight over a large flight envelop  
43 (Beatus et al., 2015; Fry et al., 2003; Muijres et al., 2014). This aerial success hinges partly on  
44 flies' ability to precisely control subtle wing movement through regulating the firing rate and  
45 timings of steering muscles (Dickinson and Tu, 1997; Lindsay et al., 2017), despite that their wings  
46 are difficult locomotor apparatus to control neuromuscularly (Balint, 2004; Deora et al., 2015) or  
47 to emulate in engineering designs (Keennon et al., 2012; Ma et al., 2013; Roll et al., 2013).  
48 Previous research has shown that even subtle changes of wing motion are sufficient to produce  
49 large maneuvering moment for a fly to execute rapid maneuvers, for examples during saccade (Fry  
50 et al., 2003), evasive maneuvers (Muijres et al., 2014) and recoveries from aerial stumbles  
51 (Ristroph et al., 2010). However, such subtle changes only result in little directional changes of  
52 aerodynamic force vector relative to the body; therefore, flies maneuver mostly according to the a  
53 helicopter model (Medici and Fry, 2012; Muijres et al., 2014), although they are able to produce  
54 large modulation of wing motion through the clutch and gearing mechanisms at the wing hinge  
55 (Deora et al., 2015).

56 The helicopter model may also apply to forward flight, as the flight speed of flies and other  
57 insects is well known to tightly correlate with its body pitch angle (David, 1978; Dudley and  
58 Ellington, 1990; Meng and Sun, 2016; Willmott and Ellington, 1997), suggesting that the tilt of  
59 aerodynamic force vector might also be small during forward flight. However, key questions  
60 remain: What wing kinematic variables do they use to control flight speed? How do these variables  
61 vary with body pitch and thrust force? and to what degree do flies change the magnitude and  
62 direction of aerodynamic forces while flying at different speeds? While the answers to these  
63 questions remain elusive, they are of critical importance for insect flight research and also for  
64 inspiring novel engineered flight, especially considering that flies and other insects fly at a broad  
65 range of speeds and produce large linear acceleration during foraging, chasing mates and escaping  
66 from predators (Collett and Land, 1975; Dudley, 2000). For example, locusts *Nomadacris*  
67 *septemfasciata* reach a speed of 13 m/s in a wind tunnel (Waloff, 1972), drone-fly *Eristalis tenax*  
68 8.5 m/s (Meng and Sun, 2016), hawkmoth *Manduca sexta* 5 m/s (Willmott and Ellington, 1997)  
69 and bumblebee *Bombus terrestris* 4.5 m/s (Dudley and Ellington, 1990). Dragonfly *Plathemis*  
70 *lydia* accelerates near 2g in prey interception flights (Mischianti et al., 2014) and blue bottle flies  
71 *Calliphora vicina* demonstrate 3g acceleration in a free flight chamber (Bomphrey et al., 2009).

72 Forward flight of insects is commonly studied in laboratory settings using wind tunnels and  
73 flight mills. Using wind tunnels, past studies range from the observation of body and wing  
74 kinematics in free (Azuma and Watanabe, 1988; David, 1978; Dudley and Ellington, 1990; Meng  
75 and Sun, 2016; Willmott and Ellington, 1997) and tethered flight settings (Vogel, 1966),  
76 identifying visual control principles (Baird et al., 2005; Fry et al., 2009; Medici and Fry, 2012;  
77 Srinivasan et al., 1996), and kinematic-data-driven modeling of flight control and stabilization  
78 (Fuller et al., 2014). Flight mills - devices that approximate continuous forward flight in a confined  
79 space through restricting an insect to a circular flight path around a pivot joint - are commonly  
80 used to determine the traveling distance of insects and their dispersal potentials (Attisano et al.,  
81 2015; Ranius, 2006; Ribak et al., 2017). Although flight mills are rarely used to study other aspects  
82 of insect forward flight, they have the potential to provide more naturalistic visual and  
83 proprioceptive sensory feedback than wind tunnel experiments. This is important because vision  
84 plays a key role in regulating forward flight speed. Previous studies have found that many insects  
85 (e.g., honeybees and flies) can robustly extract their ground speed (or retinal slip velocity) from  
86 visual patterns of varying spatial and temporal frequencies (David, 1982; Fry et al., 2009). Flies  
87 are also shown in the wind tunnel experiments to sometimes maintain a preferred ground speed  
88 invariant to substantial changes in airspeed (David, 1982) (putatively detected by air flow sensors,  
89 e.g., antenna (Fuller et al., 2014)). Therefore, flies, possibly other insects also, are able to fly at  
90 their preferred speed independent of aerodynamic power requirement if it is within their locomotor  
91 capacities. However, it is unknown whether such behavior can be reproduced in the flight mill  
92 experiments, how insects control their flight speed in the flight mill, or what happens when the  
93 limit of their locomotor capacity is reached.

94 In this study, we examined the speed control of blue bottle flies (*Calliphora vomitoria*, N=5,  
95  $42.0 \pm 8.9$  mg) in forward flight using a novel magnetically-levitated (MAGLEV) flight mill. The  
96 MAGLEV flight mill, which eliminated the mechanical friction of pivots and permitted systematic  
97 manipulation of a fly's body pitch angle and aerodynamic damping, enabled us to study the details  
98 of speed control and force-vectoring and the corresponding wing kinematic control in forward  
99 flight. In particular, we tested two force-vectoring models and determined the wing kinematic  
100 contributors to the changes in the magnitude and direction of aerodynamic forces.

## 101 **MATERIALS AND METHODS**

### 102 **MAGLEV flight mill apparatus**

103 The MAGLEV flight mill apparatus was comprised of four main components (Fig. 1A): 1) three  
104 magnetically-levitated permanent magnets as a pivot joint; 2) a horizontally-rotating shaft with  
105 attached fly and damper; 3) inner and outer enclosing walls with grating patterns and 4) three high-  
106 speed video cameras (Fastcam Mini UX100, Photron, Japan). The magnetic levitation was  
107 achieved through two electromagnets as actuators that stabilized the vertical position of the  
108 permanent magnets (i.e., the pivot joint) and rotating shaft using positional feedback provided by  
109 two linear Hall-effect sensors (A1321, Allegro microsystem, LLC. Worcester, MA, USA). The  
110 first Hall-effect sensor was placed slightly above the permanent magnets to measure the total  
111 magnetic field of the permanent magnets and electromagnets combined. The second Hall-effect  
112 sensor was attached to the rim of the top electromagnet to separate the noise (magnetic field of  
113 electromagnets) from the first Hall-effect sensor. The strength of the magnetic field was then  
114 transformed to distance as a proximity signal. A proportional-integral-derivative (PID) controller  
115 computed the current compensations for the two electromagnets to keep pivot pin/rotating shaft  
116 vertically stable. All sensor readings and computations were processed with a microcontroller  
117 (Uno, Arduino, Italy).

118 The shaft was made of a  $2 \times 254$  mm (diameter  $\times$  length) carbon fiber rod, which was  
119 sandwiched between the permanent magnets. On one end of the shaft, a magnetic metal angle pin  
120 connected a blue bottle fly to the shaft through two micro permanent magnets ( $1.58 \times 3.18$  mm,  
121 diameter  $\times$  length) (Fig. 1A-B) glued to the fly's dorsal. Caution was taken in the gluing process  
122 to minimize interference to a fly's thoracic movements and to maintain a constant angle between  
123 the angle pin and the fly's body. Note that exact body pitch angle ( $\chi$ ) was calculated from DLTdv6  
124 (Hedrick, 2008) instead of angle pin angle ( $\gamma$ ) since subtle difference existed among flies and each  
125 angle pin placement (Fig. 1B). With permanent magnet attached on dorsal, different magnetic  
126 angle pins can be easily switched to provide different prescribed pitch-angle. On the other end of  
127 the shaft, a damper was attached to create additional drag that the fly needed to overcome in steady  
128 forward flight. Two dampers of different sizes (D1:  $12.4 \times 12.7 \times 2.5$  mm and D2:  $15.2 \times 16.2 \times$   
129  $2.5$  mm, width  $\times$  length  $\times$  thickness), together with the no damper case (D0, where the aerodynamic

130 drag only came from the shaft and the insect body), total three augmented aerodynamic damping  
131 conditions were used in the experiments.

132 Flies mainly rely on visual feedback to regulate their flight speed. To provide a consistent  
133 visual environment and to enhance the visual cues they receive, an inner cylinder wall (diameter  
134 203.2 mm) and an outer cylinder wall (diameter 304.8 mm) with identical square wave grating  
135 patterns (50.8 mm interval) were used to enclose the flight mill. As a result, the flies flew in the  
136 circular corridor (width 50.8 mm) between the two walls (Fig. 1A).

137 To record the body and wing movements of the flies, three synchronized high-speed cameras  
138 were placed on the top, bottom and sideways of an enclosure region spanning approximately  $50 \times$   
139  $50 \times 50$  mm of the circular flight corridor (Fig. 1A). A circular hole was cut on the outer wall for  
140 the sideways camera to see through the corridor. We illuminated the enclosure region with three  
141 100W LED light (MonoBright LED Bi-color 750, Genaray, Brooklyn, NY, USA). The video  
142 resolution was set to be  $1280 \times 1024$  pixels with  $4000 \text{ s}^{-1}$  frame rate and  $8000 \text{ s}^{-1}$  shutter rate.  
143 Cameras were calibrated using direct linear transformation for three-dimensional body and wing  
144 kinematics extraction (Hedrick, 2008).

#### 145 **Animal preparation**

146 We used 4- to 7-day-old blue bottle flies (*Calliphora vomitoria*) hatched from pupae purchased  
147 commercially (Mantisplace, Olmsted Falls, OH, USA) and cultured in the laboratory. For each  
148 experiment, we first cold anesthetized the flies in a refrigerator for 10 minutes (Duistermars and  
149 Frye, 2008) and then transferred them to a tethering stage on an oval notch plate with dorsal side  
150 up. We used UV cure glue (4305, Loctite Corp.) to attach the micro-permanent magnet on the  
151 dorsal side of the thorax. Next, the flies were put to rest to recover from anesthesia for one hour.  
152 We then attached the flies to the rotating shaft of the flight mill and started the experiments.

#### 153 **Experimental procedure**

154 We first tested the flight performance of the flies on the flight mill and only those that could  
155 complete at least five laps of flight with  $45^\circ$  angle pin and the largest damper (D2) were used for  
156 the experiments. Each fly was attached to one end of the rotating shaft with angle pins held at  $0^\circ$ ,  
157  $22.5^\circ$ , and  $45^\circ$  (Fig. 1B). The actual body pitch angles measured from the experiments were  $5.5^\circ \pm$   
158  $3.9^\circ$ ,  $25.2^\circ \pm 3.3^\circ$  and  $41.2^\circ \pm 6.2^\circ$ . The slight differences between the angle pin angle and the

159 body pitch angle were mainly due to the slight misalignment of the angle pins to the normal of the  
160 flies' thorax. For each angle pin, three aerodynamic damping conditions described above were  
161 tested. To initiate the flight, a gentle puff of wind gust was introduced to the fly. After the initiation  
162 of flight, a fly reached to a constant forward flight speed when the wing thrust was balanced by  
163 the total aerodynamic drag acting on the damper, shaft and fly's body. After at least five laps of  
164 flight, we started recording using high-speed cameras (sample recordings are available in  
165 supplementary materials S3). In total, all flies had to complete nine different conditions (three  
166 angle pins and three damping conditions). For each condition, at least four repeated trials were  
167 performed, and for each trial at least four wingbeat cycles were recorded. After completing the  
168 trials within one condition, the flies were removed from the flight mill, put to rest for at least 10  
169 minutes, and fed with sugar water before being used for the next condition.

## 170 **Damping calibration**

171 The damping coefficients of the combined damper, rotating shaft and a fly's body for nine different  
172 conditions were calibrated using free responses of the rotating shaft. For each calibration, a dead  
173 fly with its wings removed was attached to the shaft using one of the three angle pins. To initiate  
174 the free response of the rotating shaft, a wind gust was applied to the damper. We recorded timing  
175 profile ( $t$ ) from the start to stop with a microcontroller of the rotating shaft triggering two  
176 photodiodes spaced with known distance and calculated its angular velocity ( $\omega$ ). Using blade-  
177 element analysis (Leishman, 2006) to model the aerodynamic drag, which is assumed to be  
178 quadratic, it can be shown that the equation of motion of the shaft is:

$$I\dot{\omega} = \left[ \sum_{i=1}^m \int \frac{1}{2} \rho C_D^{(i)}(r) A^{(i)}(r) r^2 dr \right] \omega^2 = \bar{C} \omega^2, \quad (1)$$

179 where  $I$  is the moment of inertia of the shaft, damper and the fly's body,  $\bar{C}$  is the calibrated  
180 damping coefficient,  $\rho$  is air density,  $m$  is the total number of objects that contribute to drag force  
181 (e.g., the shaft, dampers, and insect body),  $i$  is the index of an object. For  $i^{th}$  object,  $A^i(r)$  is the  
182 cross-sectional area of a blade-element at radial distance  $r$  from the shaft center of rotation and  
183  $C_D^{(i)}(r)$  is the corresponding drag coefficient. Integrating Eqn. 1 yields the theoretical speed profile  
184 of the shaft:

$$\omega(t) = \frac{1}{k + \left(\frac{\bar{C}}{I}\right)t}, \quad (2)$$

185 where  $k$  is the constant of integration. We then performed least square curve fitting to obtain  $\bar{C}$ .  
186 The mean, standard deviation, and coefficient of determination  $R^2$  are reported in Table 1.

### 187 **Kinematics extraction**

188 We used DLTdv6 (Hedrick, 2008) to digitize anatomical landmarks on the body and wings of the  
189 blue bottle flies (Fig. 1C), which were then used to calculate the body velocity, pitch angle and  
190 wing angles (Fig. 1C-D). We defined the body roll axis ( $X_b$ ) as a unit vector from Thorax-abdomen  
191 junction to Head-thorax junction, pitch axis ( $Y_b$ ) from left wing base to the right wing base, and  
192 yaw axis ( $Z_b$ ) using the cross-product of  $X_b$  and  $Y_b$ . We defined wing spanwise axis ( $Y_w$ ) as a  
193 vector from wing base to wing tip. The cross-product of  $Y_w$  axis with a vector from wing base to  
194 the trailing edge location of vein ( $CuA_1$ ) determined the wing normal  $X_w$  axis. Next, the cross-  
195 product of  $X_w$  and  $Y_w$  determined wing chordwise axis  $Z_w$ . Body and wing rotation matrices were  
196 then calculated based on the corresponding body and wing principal axes (Murray et al., 1994),  
197 respectively. A stroke plane frame ( $X_s, Y_s, Z_s$ ) was defined by rotating the body frame about  $Y_b$   
198 axis where  $X_s$  intersected with the maximum and minimum sweep positions formed by the wing  
199 base-wing tip vectors.

200 Wing Euler angles (stroke position ( $\phi$ ), stroke deviation ( $\theta$ ) and wing rotation ( $\psi$ ), Fig. 1D)  
201 were calculated from the wing rotation matrices (Murray et al., 1994) (from the stroke plane frame  
202 to the wing frame) and body pitch angles were calculated from the body rotation matrices (Fig.  
203 1D). Body translational velocities about each principal axis were calculated by taking the  
204 derivatives of the head-thorax junction positional vector. Time series of body and wing kinematics  
205 were calculated for four complete wingbeat cycles. For each trial, we then calculated time-  
206 averaged wing kinematics from the four wingbeat cycles, while also averaging the left and right  
207 wing kinematics (mirrored with respect to  $X_b - Z_b$  plane). Euler angles of each trial were  
208 parameterized using a fifth-order Fourier series prior to kinematics analysis:

$$\phi(\hat{t}) = \phi_0 + \sum_{i=1}^5 \phi_{si} \sin(2\pi i \hat{t}) + \phi_{ci} \cos(2\pi i \hat{t}), \quad (3)$$

$$\theta(\hat{t}) = \theta_0 + \sum_{i=1}^5 \theta_{si} \sin(2\pi i \hat{t}) + \theta_{ci} \cos(2\pi i \hat{t}), \quad (4)$$

$$\psi(\hat{t}) = \psi_0 + \sum_{i=1}^5 \psi_{si} \sin(2\pi i \hat{t}) + \psi_{ci} \cos(2\pi i \hat{t}), \quad (5)$$

209



210 where  $\hat{t}$  is the dimensionless time of a wingbeat cycle (ranging from 0 to 1);  $\phi_0$ ,  $\theta_0$  and  $\psi_0$  are  
211 constant terms and  $\phi_{si}$ ,  $\phi_{ci}$ ,  $\theta_{si}$ ,  $\theta_{ci}$ ,  $\psi_{si}$  and  $\psi_{ci}$  are Fourier sine and cosine coefficients and  $i$  is  
212 the order of the Fourier series.

213 As flies change their continuous wingbeat trajectories to modulate aerodynamic forces and  
214 moments, the key changes can be captured by a finite number of wing kinematic variables that  
215 represent certain cycle-averaged features (Faruque and Sean Humbert, 2010; Sun, 2014; Taylor,  
216 2001). Here we selected 9 distinct variables that were potentially involved in the speed control and  
217 tested their contribution in the force-vectoring models (next section). The 9 wing kinematic  
218 variables were: 1) mean wingbeat frequency ( $n$ ), 2) ratio of downstroke and upstroke durations  
219 ( $T_d/T_u$ ), 3) stroke amplitude ( $\Phi$ ), 4) rotation amplitude ( $\Psi$ ), 5) deviation amplitude ( $\Theta$ ), 6) mean  
220 stroke angle ( $\bar{\phi}$ ), 7) mean rotation angle ( $\bar{\psi}$ ), 8) mean deviation angle ( $\bar{\theta}$ ), and 9) stroke plane  
221 angle ( $\beta + \chi$ ).

## 222 **Constant and variable force-vectoring models and variable importance**

223 Here we developed two force-vectoring models for the speed control of flies flying steadily in the  
224 MAGLEV flight mill: 1) constant force-vectoring model and 2) variable force-vectoring model.  
225 During steady flight, the torque acting on the shaft of the flight mill was zero, which meant that  
226 the torque due to the thrust created by the flapping wings ( $\tau_T$ ) was equal to those due to the  
227 aerodynamic drag of the shaft, damper and insect body combined ( $\tau_D$ ), the latter was proportional  
228 to the linear speed of the flies or the angular velocity of the shaft. Assuming the flapping wings  
229 create a cycle-averaged aerodynamic force with a magnitude of  $F$  and an angle  $\chi_F$  from the body  
230 longitudinal axis (Fig. 1D), it can be shown that

$$\tau_T = lF\cos(\chi_F + \chi) = \tau_D = \bar{C}\omega^2 = \frac{\bar{C}v^2}{l^2}, \quad (6)$$

231 where  $l$  is the radius of the pivot of the flight mill shaft, and  $v$  is the linear velocity of the fly. The  
232 constant force-vectoring model can be derived by assuming both  $F$  and  $\chi_F$  were constants, i.e.,  $F_0$   
233 and  $\chi_0$ , respectively; therefore the forward velocity can be predicted by,

$$v^2 = \frac{l^3}{\bar{C}}F_0\cos(\chi_0 + \chi). \quad (7)$$

234 To estimate the values of  $F_0$  and  $\chi_0$  from the body kinematic data, a nonlinear least-square  
235 regression model was used, where the residual sum of squares ( $RSS$ ) is minimized:

$$RSS = \sum_{i=1}^m (y^{(i)} - f(X_j^{(i)}, K_j))^2, \quad (8)$$

236 where  $m$  is the number of trials,  $X_j^{(i)}$  ( $i = 1 \sim m$  and  $j = 1 \sim 2$ ) is a vector of known variables  
 237 including damping coefficients  $\bar{C}$  and body pitch angle  $\chi$  from  $i^{th}$  trial,  $K_j$  ( $j = 1 \sim 2$ ) represents a  
 238 vector of regression coefficients to be estimated, i.e.,  $F_0$  and  $\chi_0$ , and  $y^{(i)}$  is the square of forward  
 239 velocity of  $i^{th}$  trial. We performed the nonlinear regression using MATLAB Statistics and  
 240 Machine Learning Toolbox (Matlab, The MathWorks, Inc., Natick, MA, USA) to estimate  
 241 parameters  $K_j$ .

242 In the variable force-vectoring model, it was assumed that both  $F$  and  $\chi_F$  also depended on a  
 243 collection of wing kinematic variables, e.g., stroke amplitude, frequency, mean rotation angle.  
 244 Therefore, it was assumed that  $F = F_0 + \Delta F(X_{jF}^{(i)}, K_{jF})$  and  $\chi_F = \chi_0 + \Delta\chi(X_{j\chi}^{(i)}, K_{j\chi})$ , where  $X_{jF}^{(i)}$   
 245 and  $X_{j\chi}^{(i)}$  are vectors of wing kinematic variables, the values of which were known from the wing  
 246 kinematic data; and  $K_{jF}$  and  $K_{j\chi}$  are the regression coefficients for the wing kinematic variables,  
 247 and  $F_0$  and  $\chi_0$  are the regression constant terms.  $\Delta F$  and  $\Delta\chi$  are the changes of force magnitude  
 248 and direction due to wing kinematic variables, which were assumed as linear functions.  
 249 Accordingly, Eqn. 8 can be rewritten as:

$$RSS = \sum_{i=1}^m \left\{ y^{(i)} - \frac{l^3}{\bar{c}} \left[ F_0 + \Delta F(X_{jF}^{(i)}, K_{jF}) \right] \cos \left[ (\chi_0 + \Delta\chi(X_{j\chi}^{(i)}, K_{j\chi}) + \chi) \right] \right\}^2. \quad (9)$$

250 Note that in this regression process, we standardized each variable by subtracting its mean and  
 251 then dividing by its standard deviation. This standardization rendered all variables on the same  
 252 metric so that the regression coefficients were not influenced by the variables' standard deviations  
 253 (O'Rourke et al., 2005). We assumed that the changes of force magnitude ( $\Delta F$ ) depend on 8  
 254 kinematic variables (out of the 9 variables mentioned above), i.e.,  $X_{jF} = [n, T_d /$   
 255  $T_u, \Phi, \Psi, \Theta, \bar{\phi}, \bar{\psi}, \bar{\theta}]^T$ ; and the changes of force direction ( $\Delta\chi$ ) also depend on 8 kinematic  
 256 variables, i.e.,  $X_{j\chi} = [\beta + \chi, T_d / T_u, \Phi, \Psi, \Theta, \bar{\phi}, \bar{\psi}, \bar{\theta}]^T$ . Note that 7 out of the 9 variables are shared  
 257 between  $\Delta F$  and  $\Delta\chi$ , while the stroke plane angle ( $\beta + \chi$ ) exclusively affects the force direction  
 258 and wingbeat frequency ( $n$ ) exclusively affects the force magnitude. As a result, a total of 16  
 259 variables were included in the variable force-vectoring model.

260 The complexity of the variable force-vectoring model depended on the number of wing  
261 kinematic variables used. It is well-known that model with overly large number of parameters  
262 suffers from overfitting that could overinterpret the data (Burnham and Anderson, 2003).  
263 Therefore, model selection using Akaike information criterion ( $AIC$ ) (Akaike, 1998) was  
264 performed to evaluate the trade-off between the goodness-of-fit and model complexity.  $AIC$  is  
265 defined as:

$$AIC = m \cdot \ln\left(\frac{RSS}{m}\right) + 2K, \quad (10)$$

266 where  $K$  is the number of parameters in a candidate model. As a rule of thumb (Burnham and  
267 Anderson, 2003), the small-sample-size corrected version of Akaike information criterion ( $AIC_c$ )  
268 is preferred if  $\frac{m}{K} < 40$ .  $AIC_c$  is defined as:

$$AIC_c = AIC + \frac{2K^2 + 2K}{m - K - 1}. \quad (11)$$

269 Then, we calculated the  $AIC_c$  difference ( $\Delta_i$ ) between the  $AIC_c^{(i)}$  of the  $i^{th}$  candidate model and  
270 the minimum  $AIC_c$  of all models ( $AIC_c^{(min)}$ ),

$$\Delta_i = AIC_c^{(i)} - AIC_c^{(min)}. \quad (12)$$

271 The relative likelihood of  $i^{th}$  candidate model ( $g_i$ ), given the wing kinematic data  $X_{jF}$  and  $X_{jX}$  for  
272  $i^{th}$  model can be computed as,

$$\mathcal{L}(g_i | X_{jF}, X_{jX}) \propto \exp\left(-\frac{1}{2}\Delta_i\right). \quad (13)$$

273 Next, Akaike weights ( $w$ ) for all model combinations were calculated to quantify the importance  
274 of each wing kinematic variable. The Akaike weight ( $w$ ) of  $i^{th}$  candidate model is defined as:

$$w_i = \frac{\exp\left(-\frac{1}{2}\Delta_i\right)}{\sum_{q=1}^Q \exp\left(-\frac{1}{2}\Delta_q\right)}. \quad (14)$$

275 We then summed the Akaike weights over the subset of models that included  $X_j$  variable and  
276 ranked the variable importance based on the summations of Akaike weights ( $w_+$ ). In addition to  
277  $AIC_c$ , Bayesian information criterion ( $BIC$ ) was also calculated for evaluating the trade-off  
278 between the goodness-of-fit and model complexity (Burnham and Anderson, 2003), which is  
279 defined as:

$$BIC = m \cdot \ln\left(\frac{RSS}{m}\right) + K \cdot \ln(m). \quad (15)$$

280 Note that with the natural logarithm of the trial number ( $m$ ),  $BIC$  applies a larger penalty compared  
281 to  $AIC_C$  to the model complexity when  $m$  increases, which tends to result in simpler models.

282 With calibrated damping coefficients ( $\bar{C}$ ), forward velocity ( $v$ ), and the best-approximating  
283 model, cycle-averaged thrust ( $F_{Thrust}$ ) and lift ( $F_{Lift}$ ) can be estimated according to,

$$F_{Thrust} = \frac{\bar{C}v^2}{l^3}, \quad (16)$$

284 and

$$F_{Lift} = \frac{\bar{C}v^2}{l^3} \tan\left[\chi_0 + \Delta\chi\left(X_{j\chi}^{(i)}, K_{j\chi}\right) + \chi\right]. \quad (17)$$

## 285 RESULTS

### 286 Forward flight speed and its dependency on body pitch angle and aerodynamic damping

287 Using three angle pins and three dampers (D0, D1 and D2, Table 1), body pitch and aerodynamic  
288 damping of the flies were systematically varied. Results showed that for all individuals, forward  
289 velocity decreased sharply with body pitch (Fig. 2A), but only decreased slightly with damping  
290 coefficients  $\bar{C}$  (Fig. 2B), except for the medium damping (D1) when  $\chi = 22.5^\circ$ . Note that the  
291 damping coefficients of medium (D1) and large (D2) damping cases were increased by 54% and  
292 101% compared to that of small damping case (D0, no damper) (Table 1).

293 Although the dependency of forward velocity on body pitch angle and damping coefficients  
294 was consistent among individuals, there was also considerable variance of flight speed among  
295 individuals. For example, the slowest individual (BBF#1) cruised at a mean speed of 0.59 m/s in  
296 D0 case at  $\chi = 0^\circ$ , while the fastest individual (BBF#3) flew at 1.25 m/s under the same condition.  
297 It is also worth noting that all individuals performed smooth steady forward flight at lower body  
298 pitch angles ( $0^\circ$  and  $22.5^\circ$ ). However, at  $\chi = 45^\circ$  or above (not reported), the forward velocity  
299 reduced significantly to  $0.15 \pm 0.06$  m/s and occasionally some flies produced vertical oscillations  
300 of the rotating shaft in the beginning of the trials. This was possibly due to the interaction between  
301 the wing lift force that tilted the MAGLEV pivot joint and the magnetic restoring torque due to  
302 the misalignment of the pivot permanent magnets and the parallel magnetic field generated by the

303 electromagnets (Hsu et al., 2016). The oscillation usually diminished once steady-state flight has  
304 been reached.

### 305 **Wing kinematic variables during forward flight**

306 As the body pitch, damping coefficient, and the resulting flight speed changed, there also existed  
307 considerable changes in wing kinematic patterns (Fig. 3 and Fig. 4). We characterized the changes  
308 using a collection of 9 wing kinematic variables representing the cycle-averaged features. The  
309 wing kinematic changes were more strongly correlated with the body pitch angle than with  
310 damping coefficients, as only wing deviation had noticeable correlation with the damping  
311 coefficients (Columns in Fig. 3). The contributions of these kinematic variables in speed control  
312 were tested according to the variable force-vectoring model (next section).

313 Mean wingbeat frequency ( $n$ ) in each damping condition increased with body pitch angle (rows  
314 in Fig. 3), with approximately 11% increase from  $\chi = 0^\circ$  to  $\chi = 45^\circ$ . Therefore, wingbeat frequency  
315 had a clear decreasing trend with forward velocity. Mean wingbeat frequency averaged over all  
316 trials was  $158.9 \pm 16.6$  Hz, with the highest at  $172.4 \pm 12.5$  Hz ( $\chi = 45^\circ$  and D2 damping) and the  
317 lowest at  $147.2 \pm 18.7$  Hz ( $\chi = 0^\circ$  and D0 damping). The ratio of downstroke and upstroke  
318 durations ( $T_D/T_U$ ) generally increased with body pitch angle (Fig. 4A-C), as it peaked at  $1.084 \pm$   
319  $0.077$  at  $\chi = 45^\circ$  and D1 damping case and bottomed at  $0.996 \pm 0.065$  at  $\chi = 0^\circ$  and D2 damping  
320 case.

321 Wing stroke amplitude ( $\Phi$ ), the changes of which mainly resulted from the extended excursion  
322 of the wing stroke towards the end of downstroke (forward excursion), was the largest at  $\chi = 22.5^\circ$   
323 ( $123.3^\circ \pm 7.4^\circ$ ) and was the lowest at  $\chi = 45^\circ$  ( $111.1^\circ \pm 10.6^\circ$ ) (Fig. 4D-F). The mean wingtip  
324 velocity  $2\Phi nR$  ( $R$  as the wing length) dropped from  $5.08 \pm 0.59$  m/s and  $5.01 \pm 0.62$  m/s at  $\chi =$   
325  $22.5^\circ$  and  $45^\circ$ , respectively, to  $4.64 \pm 0.76$  m/s at  $\chi = 0^\circ$ .

326 Wing rotation amplitude ( $\Psi$ ) increased with body pitch angle (except  $\chi = 22.5^\circ$  and D0  
327 damping case). Maximum rotation angle ( $\psi_{max}$ ), occurred at the end of wing pronation, increased  
328 from  $47.5^\circ \pm 10.4^\circ$  at  $\chi = 0^\circ$  to  $59.9^\circ \pm 12.8^\circ$  at  $\chi = 45^\circ$  (Fig. 4G-I). Minimum rotation angle  
329 ( $\psi_{min}$ ), occurred shortly after the end of wing supination, bottomed at  $\chi = 22.5^\circ$  and rose  
330 approximately  $5^\circ$  for both  $\chi = 0^\circ$  and  $\chi = 45^\circ$  cases (Fig. 4G-I). Wing rotation angle at down-to-  
331 up stroke reversals (supination) tended to have a  $10^\circ - 14^\circ$  delay relative to stroke at  $\chi = 45^\circ$ , while

332 it was near symmetric (i.e., in phase with stroke) or slightly advanced at  $\chi = 0^\circ$  and  $22.5^\circ$  (except  
333 with D0 damping at  $\chi = 0^\circ$ ) (Fig. 4G-I). Rotation angle at up-to-downstroke reversal (pronation)  
334 was advanced at  $\chi = 45^\circ$  and was delayed at  $\chi = 0^\circ$  and  $\chi = 22.5^\circ$ .

335 Wingtip trajectories at  $\chi = 0^\circ$  and  $\chi = 22.5^\circ$  took oval shapes and those at  $\chi = 45^\circ$  were more  
336 flat (Fig. 3 A-F for  $\chi = 0^\circ$  and  $\chi = 22.5^\circ$ ; and G-I for  $\chi = 45^\circ$ ). Deviation amplitude ( $\Theta$ ) decreased  
337 with increasing body pitch angle (Fig. 4A-C):  $19.6^\circ \pm 8.9^\circ$  at  $\chi = 0^\circ$  and  $22.5^\circ$ , and  $12.8^\circ \pm 5.8^\circ$  at  
338  $\chi = 45^\circ$ . Deviation amplitude ( $\Theta$ ), which is the only kinematic variable that has noticeable  
339 correlation with damping coefficients, increased slightly with increasing damping coefficient, for  
340 example from  $15.6^\circ \pm 4.7^\circ$  with D0 to  $24.0^\circ \pm 10.8^\circ$  with D2 at  $\chi = 0^\circ$ . The increasing trend was  
341 less significant at  $\chi = 22.5^\circ$  and  $\chi = 45^\circ$  (Fig. 4A-C). A subtle decrease of wing stroke plane angle  
342 ( $\beta + \chi$ ) can be observed from  $\chi = 0^\circ$  to  $\chi = 45^\circ$  (rows in Fig. 3). The changes were limited,  
343 remaining within  $44.5^\circ \pm 5^\circ$  for all trials.

#### 344 **Force-vectoring models for speed control and variable importance of wing kinematic** 345 **variables**

346 Two force-vectoring models for predicting the flight speed of flies were tested through nonlinear  
347 regression based on the estimated thrust, measured flight speed, and a collection of wing kinematic  
348 variables (described above). The nonlinear regression on constant force-vectoring model yielded  
349 total aerodynamic force magnitude  $F_0 = 2.19 \times 10^{-4}$  N with 95% confidence interval [ $1.99 \times 10^{-4}$   
350 N,  $2.40 \times 10^{-4}$  N] (or 53.2% [48.2%, 58.1%] of mean body weight) and  $\chi_0 = 47.8^\circ$  [45.5°, 50.0°].  
351 The RMSE of the prediction based on constant force-vectoring model was  $0.131 \text{ m}^2/\text{s}^2$  with  $R^2$  of  
352 0.71. It can be seen that the residual errors of constant force-vectoring model were relatively large  
353 as forward velocity increased (Fig. 5A).

354 The contributions of the 16 wing kinematic variables selected were tested in the variable force-  
355 vectoring model. Note that mean wingbeat frequency ( $n$ ) and wing stroke plane angle ( $\beta + \chi$ )  
356 were incorporated exclusively in force magnitude and force direction, respectively; and the other  
357 7 wing kinematic variables, i.e.,  $T_d/T_u$ ,  $\Phi$ ,  $\Psi$ ,  $\Theta$ ,  $\bar{\phi}$ ,  $\bar{\psi}$ ,  $\bar{\theta}$ , were included in both force magnitude  
358 and force direction. Nonlinear regressions were performed on all possible variable-combinations  
359 (total combinations:  $\sum_{K=1}^{16} \frac{16!}{(16-K)!K!} = 65535$ ).  $AIC_c/BIC$  and Akaike weights ( $w$ ) were computed  
360 for model selection and variable importance, respectively. From Fig. 5B, the  $AIC_c$  best-

361 approximating model included 9 wing kinematic variables that contributed to the changes in the  
362 aerodynamic force magnitude and direction (Table 2); and *BIC* applied a larger penalty on model  
363 complexity, which reduced the variable number to 6 (Fig. 5B). *AIC<sub>C</sub>* best-approximating model  
364 gave  $F_0 = 3.04 \times 10^{-4}$  N with 95% confidence intervals [ $2.85 \times 10^{-4}$  N,  $3.22 \times 10^{-4}$  N] (or 73.7%  
365 [69.2%, 78.3%] of mean body weight),  $\chi_0 = 51.7^\circ$  [50.6°, 52.9°], RMSE of 0.097 m<sup>2</sup>/s<sup>2</sup>, and  $R^2$  of  
366 0.922. *BIC* best-approximating model gave  $F_0 = 3.06 \times 10^{-4}$  N with 95% confidence intervals [ $2.86$   
367  $\times 10^{-4}$  N,  $3.25 \times 10^{-4}$  N] (or 74.2% [69.5%, 78.9%] of mean body weight),  $\chi_0 = 51.8^\circ$  [50.7°, 52.9°],  
368 RMSE of 0.104 m<sup>2</sup>/s<sup>2</sup>, and  $R^2$  of 0.904. Both *AIC<sub>C</sub>* and *BIC* best-approximating model reduced  
369 the residual error compared to constant force-vectoring model, particularly in higher velocity range  
370 (Fig. 5A). Here, we chose *AIC<sub>C</sub>* model as our best-approximating model which biased slightly  
371 towards the goodness-of-fit than the *BIC* and included 3 additional wing kinematic variables (Fig.  
372 6).

373 Next, with the summations of Akaike weights ( $w_+$ ), the relative importance for the wing  
374 kinematic variables is shown in Fig. 6. Wing kinematic variables that contributed to the force  
375 magnitude were: 1) wingbeat frequency ( $n$ ), 2) stroke amplitude ( $\Phi$ ), 3) mean deviation angle ( $\bar{\theta}$ ),  
376 4) ratio of downstroke and upstroke durations ( $T_D/T_U$ ), and 5) mean stroke angle ( $\bar{\phi}$ ). Among these  
377 variables, force magnitude  $\Delta F$  (in Eqn. 9) depended negatively on  $T_D/T_U$ , meaning smaller  
378 duration of downstroke period increases the  $\Delta F$ , while higher wingbeat frequency and amplitude,  
379 upward shift of mean deviation angle (so that wing trajectory becomes more oval) and dorsal  
380 (backward) shift of mean stroke angle all led to higher  $\Delta F$  (see signs of  $K_{jF}$  in Table 2). Kinematic  
381 variables that contributed to force direction were: 1) stroke plane angle ( $\beta + \chi$ ), 2) mean rotation  
382 angle ( $\bar{\psi}$ ), 3) mean stroke angle ( $\bar{\phi}$ ), and 4) mean deviation angle ( $\bar{\theta}$ ). Among these variables,  
383 force direction ( $\Delta\chi$  in Eqn. 9) depended positively only on  $\bar{\theta}$ , meaning upward shift of mean  
384 deviation angle (or more oval wing trajectory) results in a backward tilt of force direction ( $\Delta\chi$   
385 increases), while the increases in  $\beta + \chi$  (i.e., forward tilt of stroke plane),  $\bar{\psi}$  (i.e., increased  
386 pronation/decreased supination), and  $\bar{\phi}$  (i.e., backward shift of wing stroke angle), all result in a  
387 forward tilt of the force direction ( $\Delta\chi$  decreases) (see signs of  $K_{j\chi}$ , Table 2).

388 As the body pitch angle  $\chi$  increased and flight speed decreased, changes in  
389  $n$  (increase) and  $\bar{\phi}$  (increase) led to increases on force magnitude (see effect on force magnitude  
390 as  $\chi$  increases, in Table 2), while the changes in  $\Phi$  (decrease),  $\bar{\theta}$  (decrease), and  $T_d/T_u$  (increase),

391 led to the decrease in force magnitude (Table 2). In total, the force magnitude increased slightly  
392 with the increasing pitch angle, as the collective result of all wing kinematic changes. In addition,  
393 as the body pitch angle increased, all the changes of wing kinematic variable resulted in a forward  
394 tilt of force direction (see effect on force direction as  $\chi$  increases Table 2) ( $\beta + \chi$  increases,  $\bar{\psi}$   
395 increases,  $\bar{\phi}$  increases and  $\bar{\theta}$  decreases), thereby to compensate the thrust loss due to the backward  
396 force tilt.

## 397 **DICUSSION**

### 398 **Flies control forward velocity using their equivalent to the helicopter control**

399 Not surprisingly, the inverse dependency between the forward velocity ( $v$ ) and the body pitch  
400 angle ( $\chi$ ) (Fig. 2A) in blue bottle flies is consistent with those observed in other insect species  
401 (Azuma and Watanabe, 1988; David, 1978; Dudley and Ellington, 1990; Meng and Sun, 2016;  
402 Willmott and Ellington, 1997) and birds (Brown, 1963; Pennycuick, 1968). This suggests that blue  
403 bottle flies mainly rely on body pitch adjustment to vector the wing aerodynamic forces to produce  
404 thrust and regulate flight speed. However, the current study reveals more intricacies in the force-  
405 vectoring and speed control of flies, which show close resemblance to those of helicopters, or to  
406 the “helicopter model”. Helicopters create thrust and pitch moment using cyclic and collective  
407 pitch, in conjunction with throttle (Leishman, 2006). Collective pitch and throttle increase the force  
408 magnitude by symmetrically increasing the blade AoA and engine speed, respectively. Cyclic pitch  
409 tilts the rotor disc and aerodynamic force forward through precession effect and blade flapping  
410 caused by asymmetric modulation of blade AoA (Leishman, 2006). This produces a forward thrust  
411 and a pitch moment that tilts the helicopter body forward. In this process, the tilt of the rotor disc  
412 is relatively small and less conspicuous than the tilt of the helicopter body itself; as a result, the  
413 angle between the aerodynamic force and the helicopter body is only modulated within a limited  
414 range, and the total vectoring of the aerodynamic force is determined mainly by the body pitch.  
415 This gives rises to the so-called helicopter model, where the thrust and speed are mainly  
416 determined by body pitch and throttle.

417 Through testing constant and variable force-vectoring models, here we show that blue bottle  
418 flies flying in the flight mill closely follow the helicopter model. First, the constant force-vectoring  
419 model (Eqn. 7), assuming the thrust and forward velocity are determined solely by body pitch,  
420 yields a reasonable prediction of the forward velocity ( $R^2 = 0.71$ ,  $RMSE = 0.131 \text{ m}^2/\text{s}^2$ ), confirming



421 the dominant role of body pitch in speed control. Next, the variable force-vectoring model (Eqn.  
422 9) further reveals the importance of wing kinematic control in predicting the flight speed, similar  
423 to the role of collective pitch, cyclic pitch, and throttle of helicopters. Specifically, the magnitude  
424 of the aerodynamic force is controlled by mean deviation angle, ratio of downstroke and upstroke  
425 duration, and mean stroke angle, which can be seen as flies' equivalent of collective pitch (Fig. 6).  
426 In addition, stroke amplitude and wingbeat frequency also control the force magnitude, which  
427 resemble the function of throttle, or the "engine speed" of the helicopters. The force direction, on  
428 the other hand, is controlled primarily by stroke plane angle, mean rotation angle, mean stroke  
429 angle, and mean deviation angle (Fig. 6), which can be seen as flies' equivalent of cyclic pitch.  
430 The results also show that these kinematic variables collectively lead to moderate modulation of  
431 force magnitude ( $\Delta F = 8.5 \times 10^{-5} \pm 7.2 \times 10^{-5}$  N, or  $20.5 \pm 17.5\%$  of mean body weight in Eqn.9),  
432 but only minor change in force vector direction ( $\Delta\chi = 3.76 \pm 2.77^\circ$  in Eqn. 9), which resembles  
433 closely to the speed control of helicopter.

434 In summary, our results show that although flies use flapping wings instead of rotary wings,  
435 and are capable of large modulation of wing kinematic (Deora et al., 2015), their thrust generation  
436 mechanism and flight speed control still conform to the helicopter model with limited change of  
437 wing kinematics, at least within the range of speeds achieved while flying in the MAGLEV flight  
438 mill. Large modulation of wing kinematics presumably only occur during short-period transient  
439 flight such as landing on the ceiling (unpublished data from authors) and recovery from extreme  
440 perturbations (Beatus et al., 2015). Finally, note that the contribution of body pitch on speed  
441 control may subject to saturation at higher speed, where wing kinematic modulation becomes the  
442 primary mechanism. For example, a recent study (Meng and Sun, 2016) show that drone-fly can  
443 fly at a wide range of speed (3.1m/s to 8.4 m/s) for a brief amount of time prior to landing at almost  
444 the same body pitch (close to zero degrees), and relatively large changes in wing kinematics are  
445 employed by the flies to regulate speed.

#### 446 **Physical significance of wing kinematic variables identified in the $AIC_c$ best approximating** 447 **model**

448 In variable force-vectoring model, we have identified a collection of wing kinematic variables (Fig.  
449 6), which represent either symmetric or asymmetric changes of wing motion between half-strokes.  
450 In our experiments, these kinematic variables changed in response to the changes of body pitch

451 angle, together they control the flight speed of the flies through altering the aerodynamic force  
452 magnitude and direction. The specific roles of each wing kinematic variables in modulating the  
453 force magnitude and direction are quantified by the regression coefficients  $X_{jF}$  and  $X_{j\chi}$  in Table 2.  
454 The trend of their changes in response to body pitch angle can be quantified through Pearson's  
455 bivariate correlation between each wing kinematic variables and the body pitch, and the signs of  
456 the regression coefficients are summarized in Table 2, together with the magnitude of their changes  
457 quantified by their standard derivation. With these results, here we discuss the physical  
458 significance of each wing kinematic variables in force modulation and speed control.

459 The magnitude of the aerodynamic force is mainly controlled by wingbeat frequency, stroke  
460 amplitude, mean deviation and stroke angles, and the ratio of downstroke/upstroke duration (Fig.  
461 6 and Table 2). Wingbeat frequency increased by 11% on average from  $\chi = 0^\circ$  to  $\chi = 45^\circ$  (rows in  
462 Fig. 3), indicating that flies were attempting to increase force magnitude and therefore to  
463 compensate thrust loss while the force vector is being tilted backward with increasing pitch angle.  
464 This relatively small increase of wingbeat frequency is expected for flies with asynchronous power  
465 muscles, as the wingbeat frequency is primarily determined by the mechanical properties of the  
466 coupled wing-and-thoracic oscillator, which only permits slight alteration of wingbeat frequency  
467 (Bartussek et al., 2013). In addition, flies decrease the stroke amplitude  
468  $\Phi$  as  $\chi$  increases, which is accompanied by a backward shift of mean stroke angle ( $\bar{\phi}$ ), through  
469 reducing the forward excursion (Fig. 4D-F). Since the increases of the increases of both variables  
470 increase force magnitude, the decreasing trend of stroke amplitude and increasing trend of mean  
471 stroke angle, result in opposite effects on force magnitude when body pitch increases (Table 2).  
472 The backward shift of mean stroke angle also tilts the force vector forward (Table 2) and creates a  
473 pitch down torque at high pitch angle (indicating the flies are attempting to lower its body pitch to  
474 compensate thrust loss). Flies also increased the duration of upstroke (wings sweep backward),  
475 during which the thrust is mainly generated, and reduced the duration of downstroke (wings sweep  
476 forward), during which drag is mainly generated; together they both increase the total force  
477 magnitude at lower body pitch.

478 The change in mean deviation angle ( $\bar{\theta}$ ) is also a strong contributor to force magnitude, while  
479 also being a contributor to force direction. At higher flight speed (or lower pitch), there is an  
480 increase of  $\bar{\theta}$ , mainly results from the increase of deviation during downstroke (Fig. 4A-C), which

481 renders the shape of the wingtip trajectory more oval. The oval shape introduces a velocity  
482 component perpendicular to the mean stroke plane, upward during downstroke and downward  
483 during upstroke. As suggested by Sane and Dickinson (2001), upward velocity reduces AoA and  
484 drag force during downstroke and downward velocity results in an increase in AoA and thrust  
485 during upstroke, together they increase force magnitude.

486 The direction of the aerodynamic force is mainly controlled by the stroke plane angle, and  
487 mean stroke, rotation and deviation angles (Fig. 6 and Table 2). At higher body pitch angles, blue  
488 bottle flies increase  $(\beta + \chi)$  and decrease  $\bar{\theta}$  (rows in Fig. 3), although in small variations ( $44.5^\circ \pm$   
489  $5.0^\circ$  and  $3.4^\circ \pm 4.2^\circ$ ), to tilt the stroke plane and the aerodynamic forces more forward as body  
490 pitch angle increases, which are clear signs of attempting to compensate the loss of thrust. At large  
491 pitch angles, they also increase the mean rotation angle (shifted forward from  $8^\circ$  to  $16^\circ$ ), this  
492 increases and decreases the AoA during upstroke and downstroke respectively, and also tilt the  
493 force vector forward. In summary, we find all 4 wing kinematic variables contributed to the force  
494 direction tend to compensate the loss of thrust as the body pitches up.

#### 495 **Left and right wing asymmetry**

496 In the analysis of wing kinematic variables responsible for forward flight, we averaged left and  
497 right wing kinematics. However, asymmetry was observed between left and right wing motion due  
498 to the rotational nature of the flight mill. For example, mean right (inner) wing stroke amplitude  
499 ( $\Phi_r$ ) was  $13^\circ$  higher than mean left (outer) wing stroke amplitude ( $\Phi_l$ ). A likely explanation is  
500 that the halteres – organs modified from hindwings, unique to *Diptera*, measure the angular rate  
501 (Dickinson, 1999; Taylor and Krapp, 2007) – sensed the difference between left and right wings  
502 and tried to initiate a body yaw turn (Dickinson, 1999). Another possibility for the wing asymmetry  
503 could be due to the blue bottle flies' tendency to perform corrective yaw turns to balance the optical  
504 flow experienced by the left and right compound eyes (29 out of 154 total trials,  $\Phi_l > \Phi_r$ ). Note  
505 that, due to the use of identical spatial frequency of the grating patterns on the two walls, the outer  
506 wall had higher temporal frequency because of the larger radius. It has been shown that honeybees  
507 use a “centering response” to mediate the unbalanced optical flow (Srinivasan and Zhang, 2004).  
508 Subtle stroke amplitude difference between left and right wing can produce roll and yaw moment  
509 (Fry et al., 2003), the  $13^\circ$  difference observed here is higher than those observed in free flight  
510 saccades in fruit flies, which is likely to result from either continuous yawing or saturated saccadic

511 responses (because of the tether, the error in yaw or roll control cannot be compensated, and any  
512 integral controller tends to saturate the response (Muijres et al., 2015)). Nevertheless, the existence  
513 of the asymmetry does not prevent us from analyzing the forward flight by averaging the left and  
514 right wing kinematics, and interestingly it also shows the potential of using the flight mill to  
515 investigate a fly's speed control and yaw responses to (bilaterally asymmetric) visual stimuli  
516 together with mechanosensory inputs in steady forward flight.

### 517 **The advantages and limitations of experiments using MAGLEV flight mill**

518 In this study, we demonstrated a novel design and use of MAGLEV flight mill in studying  
519 voluntary steady forward flight of blue bottle flies. Instead of "forcing" the flies to fly under a  
520 prescribed freestream airflow in wind tunnels, the blue bottle flies flew voluntarily with a speed  
521 resulted from its own effort and sensorimotor response. Further, the magnetically-levitated pivot  
522 joint eliminated the mechanical friction compared to traditional flight mills with mechanical pivots,  
523 therefore allowing easier and more accurate calibration and manipulation of aerodynamic damping  
524 that the flies had to overcome. Together with magnetic angle pins to vary body pitch angle and the  
525 enclosed cylinder walls covered by grating patterns to keep consistent visual stimuli, this  
526 MAGLEV flight mill enabled semi-free flight experiments in a well-controlled environment.  
527 Therefore, this device could be further exploited to investigate insects' aerodynamics, dynamics,  
528 sensing and control in forward flight.

529 Compared with the free flight experiments using wind tunnels, there are also a few limitations  
530 of the MAGLEV flight mill. First, due to the existence of aerodynamic damping acting on the  
531 rotating rod, which cannot be fully eliminated, the fastest steady-flight speed of the blue bottle  
532 flies observed in the experiments was 1.25 m/s, which is slower than that in free flight. However,  
533 flies in free flight hardly reach a steady-state. For example, flying in a 1.6 m<sup>3</sup> chamber, blue bottle  
534 flies showed top speed at 2.5 m/s and an average speed at 1.3 m/s with constantly accelerate and  
535 decelerate (Bomphrey et al., 2009). Second, studies showed that tethering may significantly reduce  
536 wingbeat frequency (Baker et al., 1981; Betts and Wootton, 1988; Kutsch and Stevenson, 1981).  
537 However, no significant difference in wingbeat frequency was observed between the current study  
538 (158.9 Hz in average) and typical blowflies (150Hz) (Dickinson, 1990). Likewise, the same  
539 conclusion was made in beetles' forward flight in another flight mill study (Ribak et al., 2017).  
540 Third, the rotational nature of the flight mill has caused noticeable bilateral wing asymmetries as

541 described above. While here we considered the effect of these asymmetries negligible on the  
542 forward speed, they need to be limited to certain degree by using sufficiently large rod radius.  
543 Nevertheless, as described above, they can be possibly exploited to study the role of visual and  
544 mechanosensory feedback in forward flight. Lastly, lift was significantly reduced (mean lift is  
545 69.5 % of mean body weight) since flies did not have to actively maintain aloft. This reduction  
546 could be slightly remedied by banking the roll axis during circular flight to balance the centrifugal  
547 force (Ribak et al., 2017). Nonetheless, holding the effects of these limitations in check, this device  
548 provides an alternative approach to a wind tunnel to study insect forward flight in controlled  
549 conditions and has large potential to be further exploited in the future as a common tool in insect  
550 flight research.

## 551 LIST OF SYMBOLS AND ABBREVIATIONS

|     |                |                                               |
|-----|----------------|-----------------------------------------------|
| 552 | $A$            | area                                          |
| 553 | $AIC$          | Akaike information criterion                  |
| 554 | $AIC_C$        | small sample AIC                              |
| 555 | $BIC$          | Bayesian information criterion                |
| 556 | $\beta$        | stroke plane angle relative to horizontal     |
| 557 | $\beta + \chi$ | stroke plane angle relative to body long axis |
| 558 | $C_D$          | drag coefficient                              |
| 559 | $\bar{c}$      | average damping coefficient                   |
| 560 | D1~D3          | no damper, medium damper, and large damper    |
| 561 | $\Delta_i$     | AIC difference of $i^{th}$ model              |
| 562 | $F$            | Resultant force                               |
| 563 | $F_{thrust}$   | thrust force                                  |
| 564 | $F_{lift}$     | lift force                                    |
| 565 | $\gamma$       | angle pin angle                               |
| 566 | $I$            | moment of inertia                             |

|     |                                      |                                                                                      |
|-----|--------------------------------------|--------------------------------------------------------------------------------------|
| 567 | $k$                                  | constant of integration                                                              |
| 568 | $K_{jF}, K_{j\chi}$                  | standardized regression coefficients of wing kinematic variables contribute to force |
| 569 |                                      | magnitude and force direction                                                        |
| 570 | $K$                                  | number of parameter in the candidate model                                           |
| 571 | $l$                                  | radius of flight mill                                                                |
| 572 | $m$                                  | total number of trials                                                               |
| 573 | $n$                                  | wingbeat frequency                                                                   |
| 574 | $\Phi$                               | stroke amplitude                                                                     |
| 575 | $\bar{\phi}$                         | mean stroke angle                                                                    |
| 576 | $\phi_0, \phi_{si}, \phi_{ci}$       | constant, sine, and cosine Fourier coefficients of stroke position                   |
| 577 | $\Psi$                               | rotation amplitude                                                                   |
| 578 | $\bar{\psi}$                         | mean rotation angle                                                                  |
| 579 | $\psi_0, \psi_{si}, \psi_{ci}$       | constant, sine, and cosine Fourier coefficients of wing rotation                     |
| 580 | $\rho$                               | mass density of the fluid                                                            |
| 581 | $R$                                  | wing length                                                                          |
| 582 | $R^2$                                | coefficient of determination                                                         |
| 583 | $S$                                  | first moment of area                                                                 |
| 584 | $t$                                  | time                                                                                 |
| 585 | $\hat{t}$                            | dimensionless time                                                                   |
| 586 | $T_D/T_U$                            | ratio of downstroke and upstroke durations                                           |
| 587 | $\Theta$                             | deviation amplitude                                                                  |
| 588 | $\bar{\theta}$                       | mean deviation angle                                                                 |
| 589 | $\theta_0, \theta_{si}, \theta_{ci}$ | constant, sine, and cosine Fourier coefficients of stroke deviation                  |
| 590 | $\tau$                               | torque                                                                               |

|     |                     |                                                                            |
|-----|---------------------|----------------------------------------------------------------------------|
| 591 | $v$                 | body forward velocity                                                      |
| 592 | $\omega$            | flight mill angular velocity                                               |
| 593 | $w$                 | Akaike weight                                                              |
| 594 | $w_+$               | summation of Akaike weights                                                |
| 595 | $\chi$              | body pitch angle                                                           |
| 596 | $\chi_0$            | angle between total force vector and body pitch axis                       |
| 597 | $X_{jF}, X_{j\chi}$ | wing kinematic variables contribute to force magnitude and force direction |
| 598 | $(X, Y, Z)$         | global coordinate frame                                                    |
| 599 | $(X_b, Y_b, Z_b)$   | body coordinate frame                                                      |
| 600 | $(X_s, Y_s, Z_s)$   | stroke plane coordinate frame                                              |
| 601 | $(X_w, Y_w, Z_w)$   | wing coordinate frame                                                      |

## 602 **COMPETING INTERESTS**

603 The authors declare no competing interests.

## 604 **AUTHOR CONTRIBUTIONS**

605 S.J.H. and B.C. contributed to the design of the experiments. S.J.H and N.T. prepared and  
606 conducted the experiments and contributed to the data analyses. All authors contributed to the  
607 interpretation of the findings and the manuscript preparation.

## 608 **FUNDING**

609 This research was supported by the National Science Foundation (CMMI 1554429 to B.C.).

## 610 **REFERENCES**

- 611 **Akaike, H.** (1998). Information Theory and an Extension of the Maximum Likelihood Principle.  
612 In *Selected Papers of Hirotugu Akaike*, pp. 199–213. Springer, New York, NY.
- 613 **Attisano, A., Murphy, J. T., Vickers, A. and Moore, P. J.** (2015). A simple flight mill for the  
614 study of tethered flight in insects. *J. Vis. Exp. JoVE* (106).
- 615 **Azuma, A. and Watanabe, T.** (1988). Flight Performance of a Dragonfly. *J. Exp. Biol.* **137**, 221–  
616 252.

- 617 **Baird, E., Srinivasan, M. V., Zhang, S. and Cowling, A.** (2005). Visual control of flight speed  
618 in honeybees. *J. Exp. Biol.* **208**, 3895–3905.
- 619 **Baker, P. S., Gewecke, M. and Cooter, R. J.** (1981). The natural flight of the migratory locust,  
620 *Locusta migratoria* L. *J. Comp. Physiol. A Neuroethol. Sens. Neural. Behav. Physiol.* **141**,  
621 233–237.
- 622 **Balint, C. N.** (2004). Neuromuscular control of aerodynamic forces and moments in the blowfly,  
623 *Calliphora vicina*. *J. Exp. Biol.* **207**, 3813–3838.
- 624 **Bartussek, J., Mutlu, A. K., Zapotocky, M. and Fry, S. N.** (2013). Limit-cycle-based control of  
625 the myogenic wingbeat rhythm in the fruit fly *Drosophila*. *J. R. Soc. Interface* **10**, 20121013.
- 626 **Beatus, T., Guckenheimer, J. M. and Cohen, I.** (2015). Controlling roll perturbations in fruit  
627 flies. *J. R. Soc. Interface* **12**, 20150075.
- 628 **Betts, C. R. and Wootton, R. J.** (1988). Wing shape and flight behaviour in butterflies  
629 (Lepidoptera: Papilionoidea and Hesperioidea): a preliminary analysis. *J. Exp. Biol.* **138**,  
630 271–288.
- 631 **Bomphrey, R. J., Walker, S. M. and Taylor, G. K.** (2009). The typical flight performance of  
632 blowflies: Measuring the normal performance envelope of *Calliphora vicina* using a novel  
633 corner-cube arena. *PLoS ONE* **4**, e7852.
- 634 **Brown, R. H. J.** (1963). The flight of birds. *Biol. Rev.* **38**, 460–489.
- 635 **Burnham, K. P. and Anderson, D. R.** (2003). *Model Selection and Multimodel Inference: A*  
636 *Practical Information-Theoretic Approach*. Springer Science & Business Media.
- 637 **Collett, T. S. and Land, M. F.** (1975). Visual control of flight behaviour in the hoverfly, *Syrpitta*  
638 *pipiens* L. *J. Comp. Physiol. A Neuroethol. Sens. Neural. Behav. Physiol.* **99**, 1–66.
- 639 **David, C. T.** (1978). The relationship between body angle and flight speed in free flying  
640 *Drosophila*. *Physiol. Entomol.* **3**, 191–195.
- 641 **David, C. T.** (1982). Compensation for height in the control of ground speed by *Drosophila* in a  
642 New, “Barber’s Pole” wind tunnel. *J. Comp. Physiol. A* **147**, 485–493.
- 643 **Deora, T., Singh, A. K. and Sane, S. P.** (2015). Biomechanical basis of wing and haltere  
644 coordination in flies. *Proc. Natl. Acad. Sci. U. S. A.* **112**, 1481–6.
- 645 **Dickinson, M. H.** (1990). Comparison of encoding properties of campaniform sensilla on the fly  
646 wing. *J. Exp. Biol.* **151**, 245–261.
- 647 **Dickinson, M. H.** (1999). Haltere-mediated equilibrium reflexes of the fruit fly, *Drosophila*  
648 *melanogaster*. **354**. 903–916.



- 649 **Dickinson, M. H. and Tu, M. S.** (1997). The function of dipteran flight muscle. *Comp. Biochem.*  
650 *Physiol. A Physiol.* **116**, 223–238.
- 651 **Dudley, T. R.** (2000). The biomechanics of insect flight. *Biomech. Insect Flight*.
- 652 **Dudley, T. R. and Ellington, C. P.** (1990). Mechanics of forward flight in bumblebees: I.  
653 Kinematics and morphology. *J. Exp. Biol.* **148**, 19–52.
- 654 **Duistermars, B. J. and Frye, M. A.** (2008). A magnetic tether system to investigate visual and  
655 olfactory mediated flight control in *Drosophila*. *JoVE J. Vis. Exp* (21).
- 656 **Faruque, I. and Sean Humbert, J.** (2010). Dipteran insect flight dynamics. Part 1 Longitudinal  
657 motion about hover. *J. Theor. Biol.* **264**, 538–552.
- 658 **Fry, S. N., Sayaman, R. and Dickinson, M. H.** (2003). The aerodynamics of free-flight  
659 maneuvers in *Drosophila*. *Science* **300**, 495–8.
- 660 **Fry, S. N., Rohrseitz, N., Straw, A. D. and Dickinson, M. H.** (2009). Visual control of flight  
661 speed in *Drosophila melanogaster*. *J. Exp. Biol.* **212**, 1120–1130.
- 662 **Fuller, S. B., Straw, A. D., Peek, M. Y., Murray, R. M. and Dickinson, M. H.** (2014). Flying  
663 *Drosophila* stabilize their vision-based velocity controller by sensing wind with their  
664 antennae. *Proc. Natl. Acad. Sci.* **111**, E1182—E1191.
- 665 **Hedrick, T. L.** (2008). Software techniques for two-and three-dimensional kinematic  
666 measurements of biological and biomimetic systems. *Bioinspir. Biomim.* **3**, 34001.
- 667 **Hsu, S.-J., Bayiz, Y. E., Liu, P. and Cheng, B.** (2016). An Insect Tether System Using Magnetic  
668 Levitation: Development, Analysis and Feedback Control. In *ASME 2016 Dynamic*  
669 *Systems and Control Conference*, p. V001T09A004—V001T09A004. American Society  
670 of Mechanical Engineers.
- 671 **Keennon, M., Klingebiel, K. and Won, H.** (2012). Development of the Nano Hummingbird: A  
672 Tailless Flapping Wing Micro Air Vehicle. p. American Institute of Aeronautics and  
673 Astronautics (p. 588).
- 674 **Kutsch, W. and Stevenson, P.** (1981). Time-correlated flights of juvenile and mature locusts: a  
675 comparison between free and tethered animals. *J. Insect Physiol.* **27**, 455–459.
- 676 **Leishman, G. J.** (2006). *Principles of helicopter aerodynamics with CD extra*. Cambridge  
677 university press.
- 678 **Lindsay, T., Sustar, A. and Dickinson, M. H.** (2017). The Function and Organization of the  
679 Motor System Controlling Flight Maneuvers in Flies. *Curr. Biol.* **27**, 345–358.
- 680 **Ma, K. Y., Chirarattananon, P., Fuller, S. B. and Wood, R. J.** (2013). Controlled Flight of a  
681 Biologically Inspired, Insect-Scale Robot. *Science* **340**, 603–607.

- 682 **Medici, V. and Fry, S. N.** (2012). Embodied linearity of speed control in *Drosophila melanogaster*.  
683 *J. R. Soc. Interface* **9**, 3260–3267.
- 684 **Meng, X. G. and Sun, M.** (2016). Wing and body kinematics of forward flight in drone-flies.  
685 *Bioinspir. Biomim.* **11**, 056002.
- 686 **Mischiati, M., Lin, H.-T., Herold, P., Imler, E., Olberg, R. and Leonardo, A.** (2014). Internal  
687 models direct dragonfly interception steering. *Nature* **517**, 1–13.
- 688 **Muijres, F. T., Elzinga, M. J., Melis, J. M. and Dickinson, M. H.** (2014). Flies evade looming  
689 targets by executing rapid visually directed banked turns. *Science* **344**, 172–177.
- 690 **Muijres, F. T., Elzinga, M. J., Iwasaki, N. A. and Dickinson, M. H.** (2015). Body saccades of  
691 *Drosophila* consist of stereotyped banked turns. *J. Exp. Biol.* **218**, 864–875.
- 692 **Murray, R. M., Li, Z. and Sastry, S. S.** (1994). *A mathematical introduction to robotic*  
693 *manipulation*. CRC press.
- 694 **O’Rourke, N., Hatcher, L. and Stepanski, E. J.** (2005). *A Step-by-Step Approach to Using SAS*  
695 *for Univariate & Multivariate Statistics*. SAS Institute.
- 696 **Pennycuik, C. J.** (1968). Power requirements for horizontal flight in the pigeon *Columba livia*.  
697 *J. Exp. Biol.* **49**, 527–555.
- 698 **Ranius, T.** (2006). Measuring the dispersal of saproxylic insects: A key characteristic for their  
699 conservation. *Popul. Ecol.* **48**, 177–188.
- 700 **Ribak, G., Barkan, S. and Soroker, V.** (2017). The aerodynamics of flight in an insect flight-  
701 mill. *PLOS ONE* **12**, e0186441.
- 702 **Ristroph, L., Bergou, A. J., Ristroph, G., Coumes, K., Berman, G. J., Guckenheimer, J.,**  
703 **Wang, Z. J. and Cohen, I.** (2010). Discovering the flight autostabilizer of fruit flies by  
704 inducing aerial stumbles. *Proc. Natl. Acad. Sci.* **107**, 4820–4824.
- 705 **Roll, J. A., Cheng, B. and Deng, X.** (2013). Design, fabrication, and experiments of an  
706 electromagnetic actuator for flapping wing micro air vehicles. In *Robotics and Automation*  
707 *(ICRA), 2013 IEEE International Conference on* (pp. 809-815). IEEE.
- 708 **Sane, S. P. and Dickinson, M. H.** (2001). the Control of Flight Force By a Flapping Wing : Lift  
709 and Drag Production. *J. Exp. Biol.* **2626**, 2607–2626.
- 710 **Srinivasan, M. V. and Zhang, S.** (2004). Visual motor computations in insects. *Annu. Rev.*  
711 *Neurosci.* **27**, 679–696.
- 712 **Srinivasan, M. V., Zhang, S., Lehrer, M. and Collett, T. S.** (1996). Honeybee navigation en  
713 route to the goal: visual flight control and odometry. *J. Exp. Biol.* **199**, 237–44.
- 714 **Sun, M.** (2014). Insect flight dynamics: Stability and control. *Rev. Mod. Phys.* **86**, 615–646.

- 715 **Taylor, G. K.** (2001). Mechanics and aerodynamics of insect flight control. *Biol. Rev.* **76**, 449–  
716 471.
- 717 **Taylor, G. K. and Krapp, H. G.** (2007). *Sensory Systems and Flight Stability: What do Insects*  
718 *Measure and Why? Advances in insect physiology*, **34**, 231-316.
- 719 **Vogel, S.** (1966). Flight in drosophila. I. Flight performance of tethered flies. *J. Exp. Biol.* **44**, 567–  
720 578.
- 721 **Waloff, Z.** (1972). Observations on the airspeeds of freely flying locusts. *Anim. Behav.* **20**, 367–  
722 372.
- 723 **Willmott, A. P. and Ellington, C. P.** (1997). The mechanics of flight in the hawkmoth *Manduca*  
724 *sexta*. I. Kinematics of hovering and forward flight. *J. Exp. Biol.* **200**, 2723–2745.
- 725

726 FIGURES

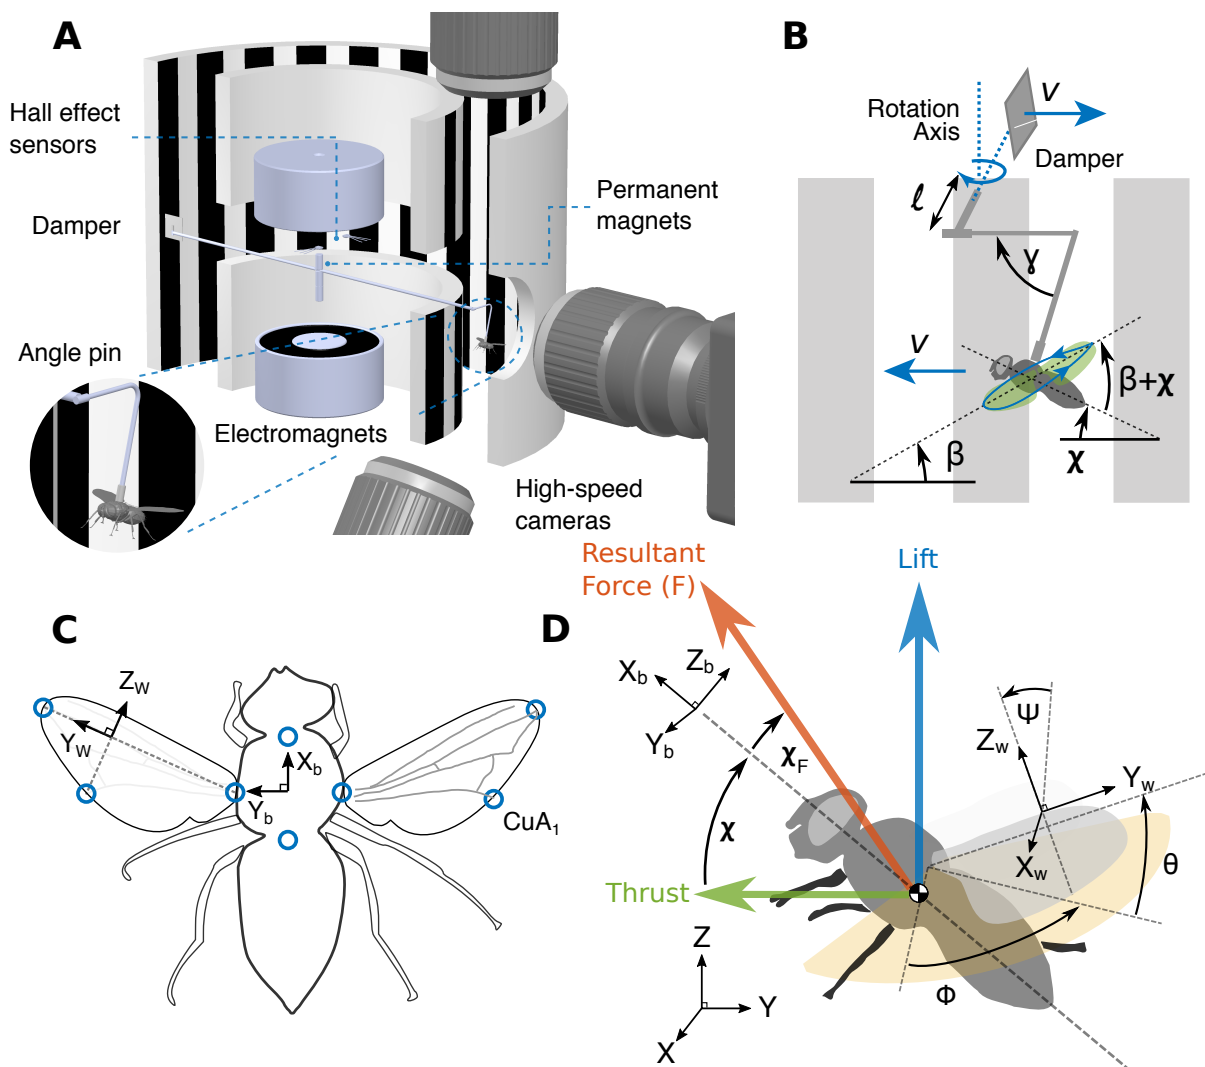

727

728 Figure 1. Experimental apparatus, coordinate frames and kinematic variables. (A) Apparatus of  
 729 the MAGLEV flight mill. MAGLEV flight mill is comprised of electromagnets, permanent  
 730 magnets, a shaft (carbon fiber,  $2 \times 254\text{mm}$ , diameter  $\times$  length), Hall effect sensors, aerodynamic  
 731 dampers, angle pins and a microcontroller (Uno, Arduino). The entire setup is surrounded by  
 732 enclosed walls with grating patterns to provide a consistent visual reference. Three high-speed  
 733 cameras are used to capture body and wings movements of blue bottle flies in forward flight. (B)  
 734 The angle pins give rise to angle  $\gamma$  between the horizontal plane and a fly's normal body axis.  $\chi$  is  
 735 the actual body pitch angle ( $\chi \approx 90^\circ - \gamma$ ) measured from DLTdv6 (Hedrick, 2008).  $\beta$  is the angle  
 736 between the stroke plane and the horizontal plane.  $l$  is the radius of the carbon fiber shaft. (C)  
 737 Anatomical landmarks (blue circles) used for body and wing kinematic extraction. (D) Definitions

738 of Body frame ( $X_b, Y_b, Z_b$ ), wing frame ( $X_w, Y_w, Z_w$ ), stroke plane (yellow shade area), wing  
739 stroke ( $\phi$ ), wing rotation ( $\psi$ ), and wing deviation ( $\theta$ ). Cycle-averaged lift is represented by the  
740 blue arrow parallel and opposite to the direction of gravity ( $-Z$ ). Cycle-averaged thrust is  
741 represented by the green arrow orthogonal to the lift vector in and lies in  $X_b - Z_b$  plane. The  
742 resultant force (red arrow) is the sum of the lift and thrust vectors.

743

744

745

746

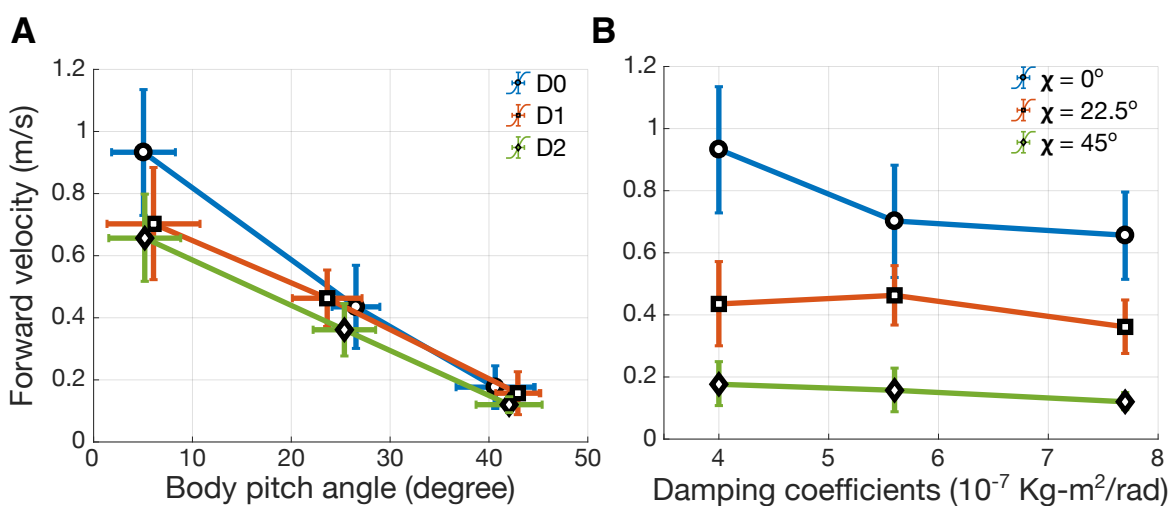

747

748 Figure 2. The dependency of forward velocity on body pitch angle and aerodynamic damping  
749 coefficient. (A) Forward velocity decreases approximately linearly with increasing body pitch  
750 angle in all three damping cases (D0 (blue), D1 (red), and D2 (green)). (B) Forward velocity  
751 decreases with increasing damping coefficients (except for  $\chi = 22.5^\circ$  and D1 damping case).

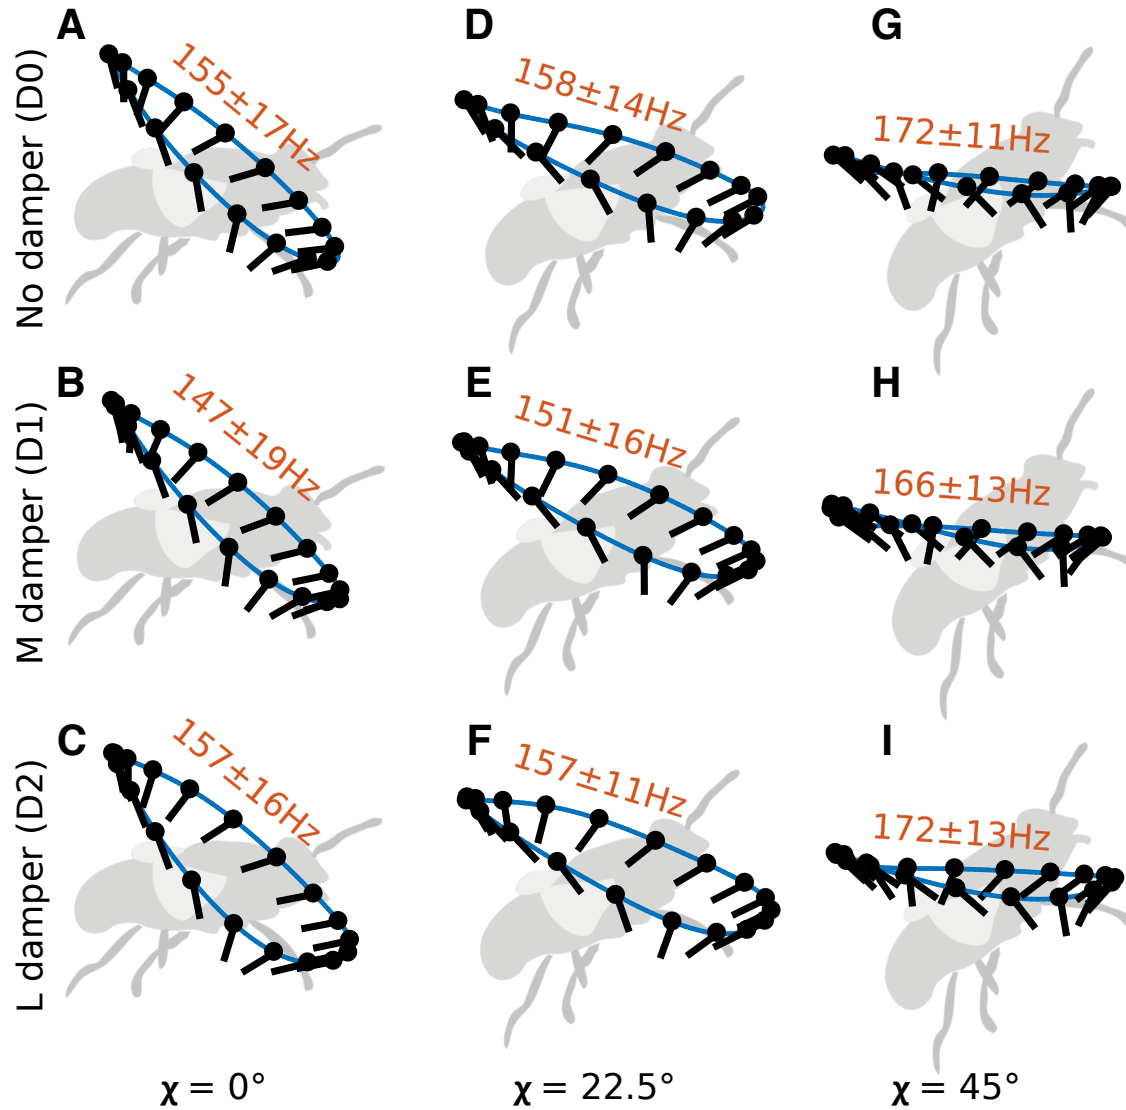

752

753 Figure 3. Averaged wingtip trajectories (blue curves) and mean wingbeat frequencies (The average  
754 and standard deviation are shown above each wingtip trajectory). At  $\chi = 0^\circ$  and  $\chi = 22.5^\circ$ , the  
755 wingtip trajectories are oval shapes, while at  $\chi = 45^\circ$ , the shape becomes flat. Stroke deviation  
756 amplitude ( $\theta$ ) is the only variable that has noticeable correlation with both body pitch angle and  
757 damping coefficients (decreases with body pitch angle and increases with damper size).

758

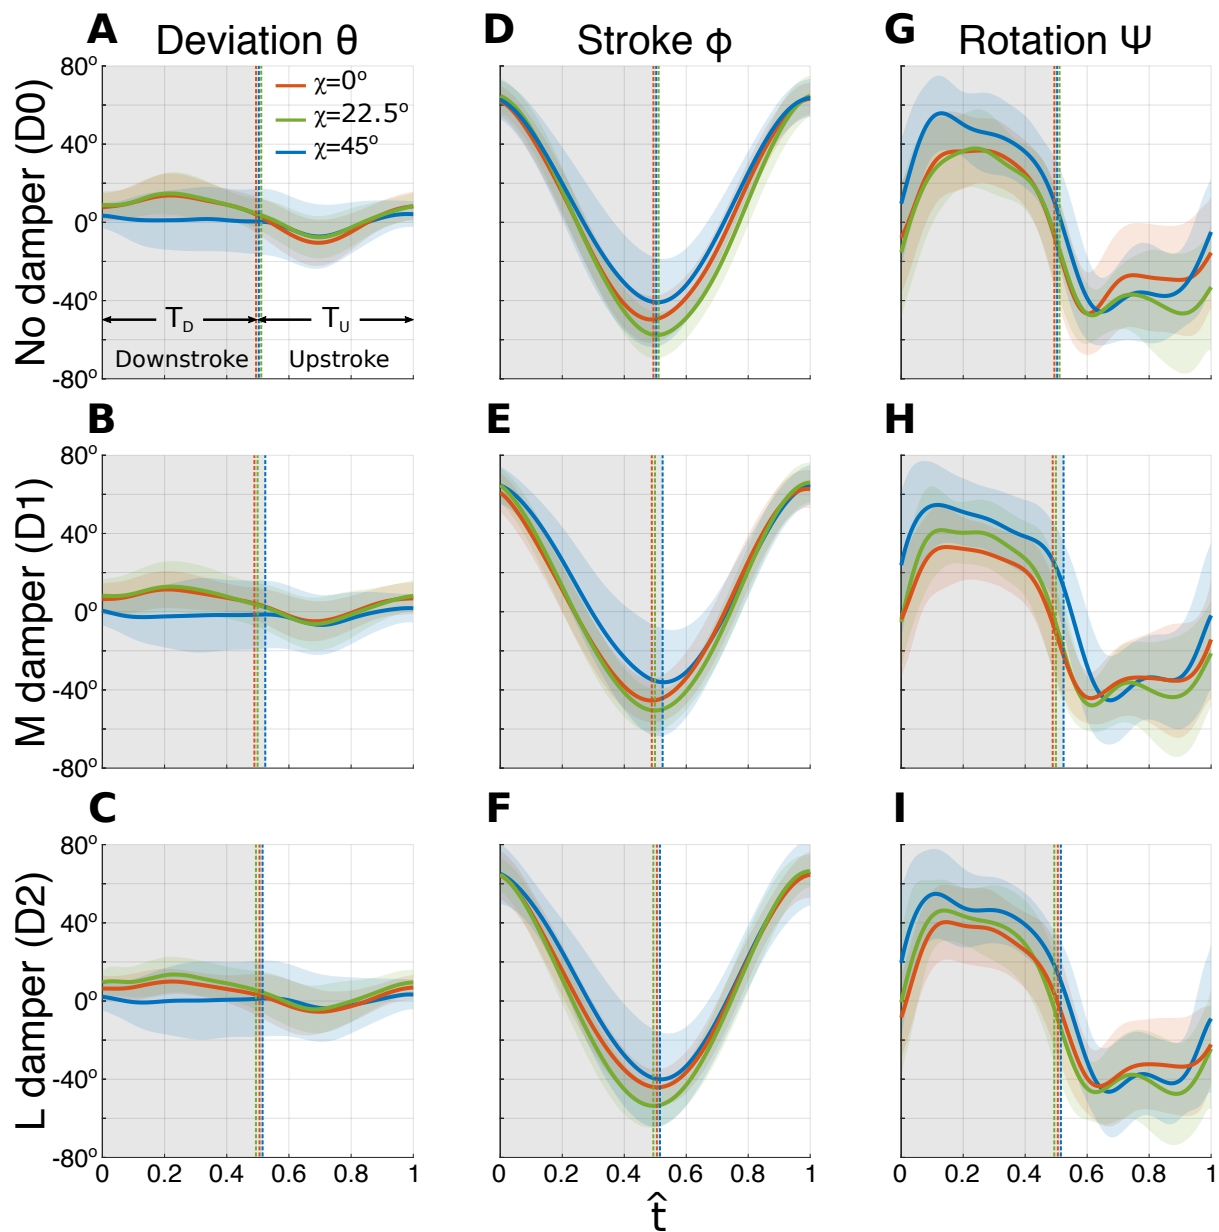

759

760 Figure 4. Traces of wing kinematic angles (deviation ( $\theta$ ), stroke ( $\phi$ ), and rotation ( $\psi$ )). The gray  
 761 shades represent the duration of wing downstroke within one wingbeat ( $\hat{t} = 0-1$ ). Colored (red:  $\chi$   
 762  $= 0^\circ$ , green:  $\chi = 22.5^\circ$ , and blue:  $\chi = 45^\circ$ ) shaded areas enclosing the curves indicate  $\pm 1$  s.d.  $T_D$   
 763 and  $T_U$  are the downstroke and upstroke durations, respectively.

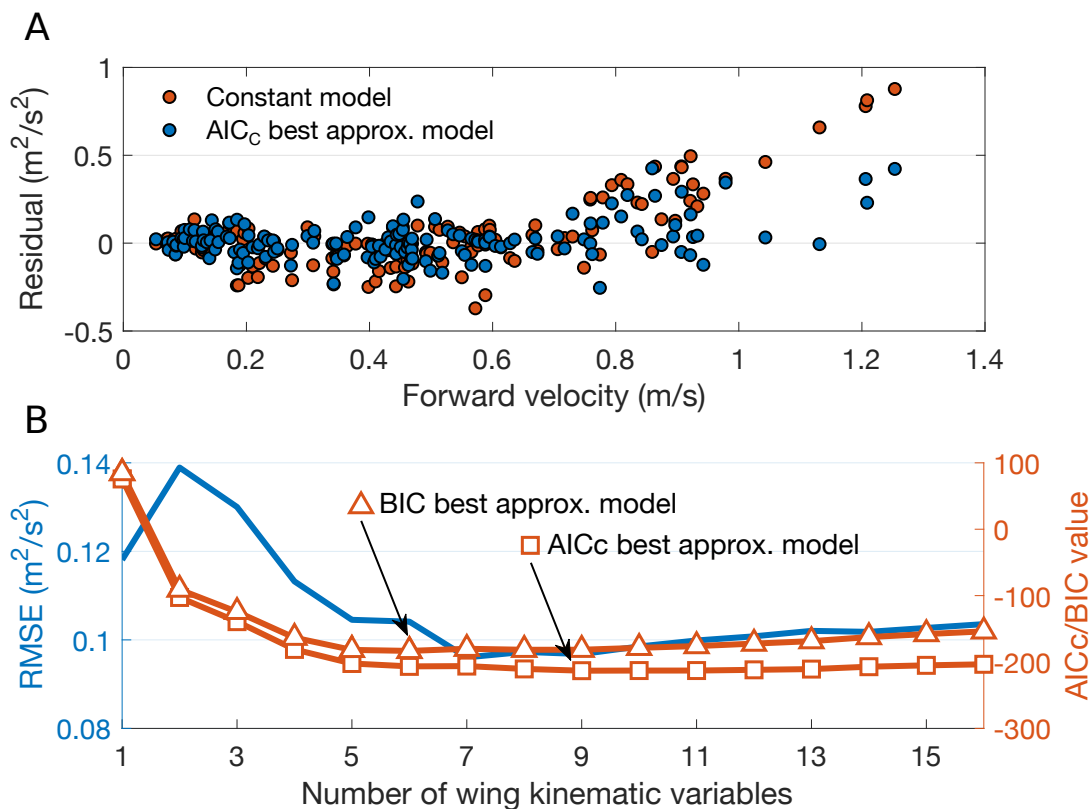

764

765 Figure 5. (A) Residual plot for the constant (red dots) and  $AIC_c$  best-approximating models (blue  
766 dots) with increasing forward velocity. (B) Graph of  $AIC_c/BIC$  as a function of number of wing  
767 kinematic variables used in variable force-vectoring model. RMSE first goes up and quickly drops  
768 to minimum when the 7 of the most important variables are included (Ranking of the variable  
769 importance is shown in Fig. 6).  $BIC$  best-approximating model takes in 6 most important variables  
770 and  $AIC_c$  includes 9 variables.



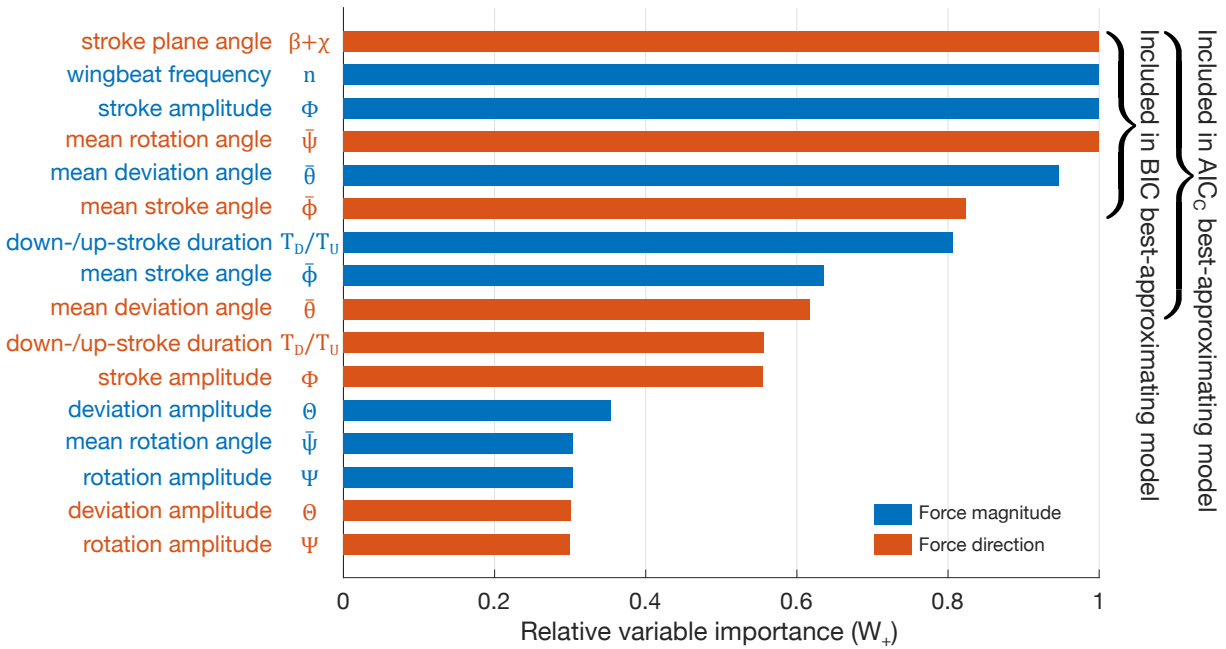

771  
 772 Figure 6. Variable importance of wing kinematic variables in the variable force-vectoring model  
 773 (importance index based on summations of Akaike weights  $w_+$ ). Blue and red bars represent the  
 774 relative importance of wing kinematic variables on force magnitude and direction, respectively.  
 775 *BIC* and *AIC<sub>C</sub>* best-approximating models include 6 and 9 most important variables, respectively.  
 776

777 **TABLES**

778

779

780

| Body pitch angle $\chi$ ( $^{\circ}$ )                               | 0                  | 22.5               | 45                 | 0                  | 22.5               | 45                 | 0                  | 22.5               | 45                 |
|----------------------------------------------------------------------|--------------------|--------------------|--------------------|--------------------|--------------------|--------------------|--------------------|--------------------|--------------------|
| Damper                                                               | N                  | N                  | N                  | M                  | M                  | M                  | L                  | L                  | L                  |
| $\bar{C}$<br>( $10^{-7} \cdot \text{Kg}\cdot\text{m}^2/\text{rad}$ ) | 3.79<br>$\pm 0.41$ | 3.89<br>$\pm 0.36$ | 3.81<br>$\pm 0.23$ | 6.25<br>$\pm 0.42$ | 5.44<br>$\pm 0.26$ | 5.98<br>$\pm 0.43$ | 8.18<br>$\pm 0.77$ | 7.53<br>$\pm 0.38$ | 7.45<br>$\pm 0.68$ |
| $R^2$                                                                | 0.99               | 0.98               | 0.99               | 0.99               | 0.99               | 0.98               | 0.99               | 0.99               | 0.99               |

781 Table 1. Results of damping coefficient calibration. N, M and L represent no damper, medium and  
782 large damper cases, respectively.

783

784

| Variables       |                | Mean $\pm$ std         | Trend as pitch ( $\chi$ ) increases | Standardized regression coefficients $K_{jF}$ ( $10^{-2}$ mN) | Increasing force magnitude as $\chi$ increases   | $w_+$ |
|-----------------|----------------|------------------------|-------------------------------------|---------------------------------------------------------------|--------------------------------------------------|-------|
| Force magnitude | $n$            | $158.9 \pm 16.6$ Hz    | +                                   | 6.54                                                          | +                                                | 1.00  |
|                 | $\Phi$         | $116.6 \pm 10.4^\circ$ | -                                   | 4.27                                                          | -                                                | 1.00  |
|                 | $\bar{\theta}$ | $3.4 \pm 4.2^\circ$    | -                                   | 6.02                                                          | -                                                | 0.95  |
|                 | $T_d/T_u$      | $1.028 \pm 0.072$      | +                                   | -3.50                                                         | -                                                | 0.81  |
|                 | $\bar{\phi}$   | $6.9 \pm 4.0^\circ$    | +                                   | 1.82                                                          | +                                                | 0.64  |
|                 | $F_0$          | --                     | --                                  | 30.38 (74% body weight)                                       | --                                               | --    |
| Variables       |                | Mean $\pm$ std         | Trend as pitch ( $\chi$ ) increases | Standardized regression coefficients $K_{j\chi}$ ( $^\circ$ ) | Tilting force vector forward as $\chi$ increases | $w_+$ |
| Force direction | $\beta + \chi$ | $44.5 \pm 5.0^\circ$   | +                                   | -3.42                                                         | +                                                | 1.00  |
|                 | $\bar{\psi}$   | $2.6 \pm 9.0^\circ$    | +                                   | -3.29                                                         | +                                                | 1.00  |
|                 | $\bar{\phi}$   | $6.9 \pm 4.0^\circ$    | +                                   | -0.83                                                         | +                                                | 0.82  |
|                 | $\bar{\theta}$ | $3.4 \pm 4.2^\circ$    | -                                   | 1.29                                                          | +                                                | 0.62  |
|                 | $\chi_0$       | --                     | --                                  | 51.73                                                         | --                                               | --    |

785 Table 2. Wing kinematic variables that modulate force magnitude and direction as body pitch angle  
786 changes. The table summarizes their mean values, standard derivation, trend (+ increasing, -  
787 decreasing) as body pitch increases, whether they increase force magnitude or tilt force vector  
788 forward as body pitch increases, and standardized regression coefficients  $K_{jF}$  and Akaike weight  
789  $w_+$  from the nonlinear regression result of  $AIC_C$  best-approximating model. The wing kinematic  
790 variables that contribute to force magnitude ( $\Delta F$ ) in Eqn. 9 are: mean wingbeat frequency ( $n$ ),  
791 stroke amplitude ( $\Phi$ ), mean deviation angle ( $\bar{\theta}$ ), ratio of downstroke and upstroke durations  
792 ( $T_D/T_U$ ), and mean stroke angle ( $\bar{\phi}$ ); and  $F_0$  is the constant term in force magnitude. The wing  
793 kinematic variables that contribute to force magnitude ( $\Delta\chi$ ) in Eqn. 9 are: stroke plane angle ( $\beta +$   
794  $\chi$ ), mean rotation angle ( $\bar{\psi}$ ), mean stroke angle ( $\bar{\phi}$ ) and mean deviation angle ( $\bar{\theta}$ ); and  $\chi_0$  is the  
795 constant term in force angle. The trend of a variable as pitch  $\chi$  increases is calculated based on the  
796 Pearson's bivariate correlation and is marked as + (increasing) or - (decreasing).  $w_+$  is the

797 summation of Akaike weights of each wing kinematic variable. A positive sign of  $K_{jF}$  indicates  
798 that an increase of the kinematic variable directly increases the force magnitude or tilts the force  
799 backward (independent of  $\chi$ ).
